# Supplementary material for: Disparities in road crash mortality among pedestrians using wheelchairs in the USA: results of a capture–recapture analysis
Source: HighWire-hosted journal article supplement (doi:10.1136/bmjopen-2015-008396), 2015-10-01
Supplement: bmjopen-2015-008396supp_table4.pdf [file bmjopen-2015-008396supp_table4.pdf]

Supplement table 4. Pedestrian mortality among persons who use wheelchairs and the general population, 2006-2012: log-linear denominator extrapolation.

|                                                                                                                                                                                                                                                         | No. of Deaths<br>(95% CI) | Wheelchair User<br>Mortality Rate per<br>100,000 Person-<br>Years (95% CI) | General Pedestrian<br>Mortality Rate per<br>100,000 Person-Years<br>(95% CI)* | Excess Risk per 100,000<br>Person-Years (95% CI) | p-value          |
|---------------------------------------------------------------------------------------------------------------------------------------------------------------------------------------------------------------------------------------------------------|---------------------------|----------------------------------------------------------------------------|-------------------------------------------------------------------------------|--------------------------------------------------|------------------|
| Gender                                                                                                                                                                                                                                                  |                           |                                                                            |                                                                               |                                                  |                  |
| Female                                                                                                                                                                                                                                                  | 112 (62 – 162)            | 0.73 (0.40 – 1.06)                                                         | 0.91 (0.90 – 0.93)                                                            | -0.18 (-0.51 – 0.15)                             | 0.28             |
| Male                                                                                                                                                                                                                                                    | 404 (303 – 505)           | 3.95 (2.96 – 4.94)                                                         | 2.15 (2.12 – 2.18)                                                            | 1.80 (0.81 – 2.79)                               | <b>&lt;0.001</b> |
| Age                                                                                                                                                                                                                                                     |                           |                                                                            |                                                                               |                                                  |                  |
| 30-49                                                                                                                                                                                                                                                   | 106 (46 – 167)            | 3.08 (1.32 – 4.83)                                                         | 1.63 (1.60 – 1.67)                                                            | 1.45 (-0.31 – 3.20)                              | 0.11             |
| 50-64                                                                                                                                                                                                                                                   | 166 (121 – 210)           | 2.60 (1.91 – 3.30)                                                         | 1.89 (1.85 – 1.94)                                                            | 0.71 (0.02 – 1.41)                               | <b>0.04</b>      |
| 65+                                                                                                                                                                                                                                                     | 256 (144 – 367)           | 1.85 (1.04 – 2.65)                                                         | 2.42 (2.36 – 2.48)                                                            | -0.57 (-1.38 – 0.23)                             | 0.16             |
| Males only<br>(30+)                                                                                                                                                                                                                                     |                           |                                                                            |                                                                               |                                                  |                  |
| 30-49                                                                                                                                                                                                                                                   | 62 (30 – 93)              | 3.87 (1.90 – 5.84)                                                         | 2.37 (2.31 – 2.42)                                                            | 1.50 (-0.47 – 3.47)                              | 0.14             |
| 50-64                                                                                                                                                                                                                                                   | 127 (89 – 166)            | 4.94 (3.44 – 6.43)                                                         | 2.83 (2.76 – 2.91)                                                            | 2.11 (0.61 – 3.61)                               | <b>0.006</b>     |
| 65+                                                                                                                                                                                                                                                     | 227 (109 – 344)           | 4.41 (2.12 – 6.71)                                                         | 3.46 (3.35 – 3.56)                                                            | 0.95 (-1.34 – 3.25)                              | 0.41             |
| Total                                                                                                                                                                                                                                                   | 528 (409 – 647)           | 2.07 (1.60 – 2.54)                                                         | 1.52 (1.50 – 1.54)                                                            | 0.55 (0.08 – 1.02)                               | <b>0.02</b>      |
| * General population pedestrian mortality rate is based on death certificate reporting to the NVSS. Denominators for mortality rate among pedestrians using wheelchairs calculated by fitting a log-linear curve among the available SIPP sample years. |                           |                                                                            |                                                                               |                                                  |                  |
