# Supplementary material for: Disparities in road crash mortality among pedestrians using wheelchairs in the USA: results of a capture–recapture analysis
Source: HighWire-hosted journal article supplement (doi:10.1136/bmjopen-2015-008396), 2015-10-01
Supplement: bmjopen-2015-008396supp_table6.pdf [file bmjopen-2015-008396supp_table6.pdf]

Supplement table 6. Pedestrian mortality among persons who use wheelchairs and the general population (FARS), 2006-2012.

|                     | No. of Deaths<br>(95% CI) | Wheelchair User<br>Mortality Rate per<br>100,000 Person-<br>Years (95% CI) | General Pedestrian<br>Mortality Rate per<br>100,000 Person-Years<br>(95% CI)* | Excess Risk per 100,000<br>Person-Years (95% CI) | p-value          |
|---------------------|---------------------------|----------------------------------------------------------------------------|-------------------------------------------------------------------------------|--------------------------------------------------|------------------|
| Gender              |                           |                                                                            |                                                                               |                                                  |                  |
| Female              | 112 (62 – 162)            | 0.73 (0.40 – 1.06)                                                         | 0.90 (0.89 – 0.92)                                                            | -0.17 (-0.50 – 0.16)                             | 0.31             |
| Male                | 404 (303 – 505)           | 3.95 (2.96 – 4.93)                                                         | 2.15 (2.12 – 2.17)                                                            | 1.80 (0.81 – 2.79)                               | <b>&lt;0.001</b> |
| Age                 |                           |                                                                            |                                                                               |                                                  |                  |
| 30-49               | 106 (46 – 167)            | 3.10 (1.33 – 4.86)                                                         | 1.66 (1.62 – 1.69)                                                            | 1.44 (-0.32 – 3.21)                              | 0.11             |
| 50-64               | 166 (121 – 210)           | 2.60 (1.91 – 3.30)                                                         | 1.87 (1.83 – 1.92)                                                            | 0.73 (0.03 – 1.43)                               | <b>0.04</b>      |
| 65+                 | 256 (144 – 367)           | 1.85 (1.04 – 2.65)                                                         | 2.27 (2.21 – 2.33)                                                            | -0.42 (-1.23 – 0.38)                             | 0.31             |
| Males only<br>(30+) |                           |                                                                            |                                                                               |                                                  |                  |
| 30-49               | 62 (30 – 93)              | 3.85 (1.89 – 5.81)                                                         | 2.42 (2.36 – 2.47)                                                            | 1.44 (-0.53 – 3.40)                              | 0.15             |
| 50-64               | 127 (89 – 166)            | 4.95 (3.45 – 6.44)                                                         | 2.80 (2.73 – 2.88)                                                            | 2.15 (0.65 – 3.64)                               | <b>0.005</b>     |
| 65+                 | 227 (109 – 344)           | 4.41 (2.12 – 6.70)                                                         | 3.24 (3.14 – 3.35)                                                            | 1.17 (-1.13 – 3.46)                              | 0.32             |
| Total               | 528 (409 – 647)           | 2.07 (1.60 – 2.54)                                                         | 1.53 (1.47 – 1.59)                                                            | 0.55 (0.09 – 1.02)                               | <b>0.02</b>      |

\* General population pedestrian mortality rate is based on FARS census and includes deaths recorded as pedestrians, personal conveyance users, non-motor vehicle transport device users, and non-occupants of unknown type.
